# Supplementary material for: A novel benzothiadiazole-based and NIR-emissive fluorescent sensor for detection of Hg2+ and its application in living cell and zebrafish imaging
Source: Royal Society of Chemistry journal article supplement (doi:10.1039/d0ob01396j), 2020-01-01
Supplement: d0ob01396j1.pdf [file d0ob01396j1.pdf]

*Supporting Information of*

**A novel benzothiadiazole-based and NIR-emissive fluorescent sensor for detection of Hg<sup>2+</sup> and its application in living cells and zebrafish imaging**

Haifeng He<sup>a</sup>, Xiangying Meng<sup>a</sup>, Lili Deng<sup>a</sup>, Qi Sun<sup>c</sup>, Xuelong Huang<sup>b\*</sup>, Ning Lan<sup>b</sup>, Feng Zhao<sup>a\*</sup>

<sup>a</sup>*Jiangxi Engineering Laboratory of Waterborne Coating, School of Chemistry and Chemical Engineering, Jiangxi Science and Technology Normal University, Nanchang 330013, People's Republic of China*

<sup>b</sup>*College of Pharmacy, Gannan Medical University, Ganzhou 341000, People's Republic of China*

<sup>c</sup>*Key Laboratory for Green Chemical Process of Ministry of Education and School of Chemistry and Environmental Engineering, Wuhan Institute of Technology, Wuhan,*

*430205, PR China*

\* Corresponding author E-mail: huangxuelong1988@126.com; zhf19752003@163.com

## **S1. General information**

Unless stated otherwise, all analytical grad chemicals and solvents used in this paper were purchased from commercial vendors. The salts used in stock solutions of metal ions were Na<sub>2</sub>SO<sub>4</sub>, KNO<sub>3</sub>, AgNO<sub>3</sub>, Pb(NO<sub>3</sub>)<sub>2</sub>, CoSO<sub>4</sub>·7H<sub>2</sub>O, ZnSO<sub>4</sub>·7H<sub>2</sub>O, MgSO<sub>4</sub>, NiSO<sub>4</sub>·6H<sub>2</sub>O, CuSO<sub>4</sub>·5H<sub>2</sub>O, FeSO<sub>4</sub>·7H<sub>2</sub>O, MnSO<sub>4</sub>·2H<sub>2</sub>O, Cr(NO<sub>3</sub>)<sub>3</sub>·9H<sub>2</sub>O, Al(NO<sub>3</sub>)<sub>3</sub>·9H<sub>2</sub>O, Fe(NO<sub>3</sub>)<sub>3</sub>·9H<sub>2</sub>O and Hg(ClO<sub>4</sub>)<sub>2</sub>·3H<sub>2</sub>O. Various anions were prepared by NaCl, NaBr, NaOH, NaF, Na<sub>2</sub>CO<sub>3</sub>, NaNO<sub>2</sub>, NaHCO<sub>3</sub>, NaH<sub>2</sub>PO<sub>4</sub>, Na<sub>2</sub>HPO<sub>4</sub>, NaNO<sub>3</sub>, Na<sub>2</sub>S, Na<sub>2</sub>SO<sub>3</sub>, NaHSO<sub>3</sub>, NaSO<sub>4</sub>, CH<sub>3</sub>COONa. The <sup>1</sup>H and <sup>13</sup>C NMR spectra were collected on a Bruker AV-400(400 MHz) in a DMSO-*d*<sub>6</sub> solution with TMS as the internal standard. Mass spectrometry was recorded with a Finnigan LCQ mass spectrometer and an Agilent 1200 LC/MSD mass spectrometer, and signals were given in m/z. Elemental analysis (EA) was obtained on a Vario ELIII CHNSO elemental analyzer. UV-vis absorption spectra were recorded on a Perkin Elmer Lambda-900 spectrophotometer. Fluorescence spectra was determined by a Hitachi F-4600 fluorescence spectrophotometer. Photoluminescence (PL) quantum yields were carried out using a Hamamatsu system for absolute PL quantum yield measurements (type C11347).

## **S2. Synthesis of compounds**



Compound M1 (228 mg, 0.5 mmol), 4-formylphenylboronic acid (75 mg, 0.5 mmol), potassium carbonate (20% wt/v aqueous solution, 1 mL) and Pd(PPh<sub>3</sub>)<sub>4</sub> (3 mol%) were dissolved in the mixture of DCM (8 mL) and toluene (16 mL). The mixture was stirred 6 h at 80 °C. The solvent was then evaporated and the product was purified by column chromatography on silica with petroleum ether/ethyl acetate (10/1 in v/v) as the eluent. The solvent was evaporated and compound M2 was obtained. <sup>1</sup>H NMR (400 MHz, CDCl<sub>3</sub>): δ (ppm) = 10.01 (s, 1H), 8.07 (d, *J* = 8.1 Hz, 2H), 7.95 (d, *J* = 8.2 Hz, 2H), 7.80 (d, *J* = 8.6 Hz, 2H), 7.75 (d, *J* = 7.4 Hz, 1H), 7.69 (t, *J* = 6.3 Hz, 1H), 7.21 (t, *J* = 7.8 Hz, 5H), 7.11 (t, *J* = 8.1 Hz, 5H), 6.99 (d, *J* = 7.3 Hz, 2H); <sup>13</sup>C NMR (100 MHz, CDCl<sub>3</sub>): δ (ppm) = 191.82, 154.04, 153.87, 148.42, 147.36, 143.42, 135.73, 134.12, 130.88, 130.02, 129.90, 129.74, 129.37, 128.98, 126.92, 125.04, 123.49, 122.59. HRMS: *m/z* = 483.14035.

### **S2.3 Synthesis of compound 2-(5-(4-(7-(4-(diphenylamino)phenyl)benzo[c][1,2,5]thiadiazol-4-yl)benzylidene)-4-oxo-2-thioxothiazolidin-3-yl)acetic acid (TBBA)**

Compound M2 (521.6 mg, 1.08 mmol) and rhodanine-3-acetic acid (203.3 mg, 1.07 mmol) were added into the acetic acid (25 mL) in the presence of ammonium acetate (83 mg) under nitrogen atmosphere. The mixture was stirred 24 h at 100 °C. After the mixture cooled to room temperature, the reaction was quenched using ice water. The precipitate was filtered and washed thoroughly with water. The solvent was then evaporated, and the product was purified by column chromatography on silica with petroleum ether/ethyl acetate (1/1 in v/v) as the eluent. The solvent was evaporated, and compound TBBA was obtained. <sup>1</sup>H NMR (400 MHz, DMSO-*d*<sub>6</sub>) δ (ppm) 8.24 (d, *J* = 8 Hz, 2H, -ArH), 8.04 (d, *J* = 4 Hz, 1H, vinyl H), 7.92-7.98 (m, 4H, -ArH), 7.83 (d, *J* = 8 Hz, 2H, -ArH), 7.35-7.38 (m, 4H, -ArH), 7.11-7.13 (m, 8H, -ArH), 4.77 (s, 2H, -CH<sub>2</sub>). <sup>13</sup>C NMR (100 MHz, DMSO-*d*<sub>6</sub>) δ = 193.76, 167.86, 167.04, 157.13, 154.69, 154.00, 148.33, 147.48, 139.94, 134.00, 133.33, 133.13, 131.66, 130.87, 130.57, 130.34, 129.69, 127.92, 125.27, 124.32, 122.73, 121.20, 115.36, 45.77. HRMS: *m/z* = 656.10131.

## **S3. Calculations**

### **S3.1 Determination of Quantum Yield**

The fluorescence quantum yield was deduced by the following equation<sup>1</sup>,

$$\Phi_x = \Phi_s \times \frac{D_x}{D_s} \times \frac{A_s}{A_x} \times \frac{\eta_x^2}{\eta_s^2}$$

Here the relative quantum yield of the probe and probe metal complex was determined by using fluorescein as standard fluorescence mean, with quantum yield of  $\Phi_{\text{ref}} = 0.90$  (in NaOH). Where the notations in the above equation such that,  $\Phi$  is the fluorescence quantum yield, D is the area under the emission spectra at  $\lambda_{\text{em}} = 446$  nm, A is the absorbance at the excitation wavelength  $\lambda_{\text{ex}} = 350$  nm,  $x$  subscript denotes unknown compound, and  $s$  as standard reference and  $\eta$  is the refractive index of the solvents used.

### S3.2 Determination of Stoichiometry by Continuous Variation Plot (Job's plot) Measurement

The stoichiometric binding ratio of probe **TBBA** and  $\text{Hg}^{2+}$  ion was confirmed by continuous variation emission analysis<sup>2</sup> at  $\lambda_{\text{em}} 675$  nm, the resulting data was plotted as change in fluorescence intensity, emission intensity in the vertical axis against the mole fraction,  $X_{\text{Hg}^{2+}}$  of  $\text{Hg}^{2+}$  ions in the horizontal axis.

### S3.3 Determination of Binding Constant

The binding constant of the **TBBA** +  $\text{Hg}^{2+}$  complex formed in solution has been determined by using the standard Benesi-Hildebrand (B-H) equation<sup>2</sup>.

$$\frac{1}{F - F_o} = \frac{1}{K_a(F_{\text{max}} - F_o)[\text{Hg}^{2+}]} + \frac{1}{F_{\text{max}} - F_o}$$

Where,  $F_o$  is the fluorescence intensity of free probe **TBBA**,  $F$  is the observed fluorescence intensity at any given concentration of  $\text{Hg}^{2+}$ ,  $F_{\text{max}}$  is the intensity at saturation point with the  $\text{Hg}^{2+}$ ,  $K_a$  is the association constant and  $[\text{Hg}^{2+}]$  is the concentration of the  $\text{Hg}^{2+}$  ions in micromolar.

### S3.4 Determination of Detection Limit

The detection limit was calculated based on fluorescence titration as a function the solubility of  $\text{Hg}^{2+}$  at  $\lambda_{\text{em}} 446$  nm. The fluorescence emission spectrum of free probe **TBBA** was measured over 3 times to determine standard deviation for blank measurement. A linear plot was constructed with average values of the intensities against the concentration of  $\text{Hg}^{2+}$  ions for determining the slope. Using the slope the detection limit was calculated from the following equation<sup>2-3</sup>.

$$LOD = \frac{3\sigma}{K}$$

where,  $\sigma$  is the standard deviation of the blank solution and  $K$  is the slope between intensity versus sample concentration.

#### **S4. Cell Cultures and Imaging**

A549 Cells were obtained from Wuhan Institute of Technology, and cultured in Dulbecco's modified Eagle's medium (DMEM) supplemented with 10% fetal bovine serum and penicillin-streptomycin ( $0.5 \text{ U} \cdot \text{mL}^{-1}$  of penicillin and  $0.5 \text{ g} \cdot \text{mL}^{-1}$  streptomycin) on a cell culture flask at  $37^\circ\text{C}$  in an atmosphere of air with 5%  $\text{CO}_2$  and constant humidity. Each cell line was seeded in a 6-well plate for 24 h. The cells were initially incubated with **TBBA** ( $10 \text{ } \mu\text{M}$ ) in culture medium for 30 min at  $37^\circ\text{C}$ . After washing three times with PBS to remove the remaining **TBBA**, the A549 cells were incubated in the absence and presence of  $\text{Hg}^{2+}$  ( $25$  and  $50 \text{ } \mu\text{M}$ ) in culture medium for another 30 min at  $37^\circ\text{C}$ . The imaging was carried out using inverted fluorescence microscopy (Olympus IX71, Japan).

#### **S5. Imaging of Zebrafish**

The 3-7 days old zebrafishes postfertilization were purchased from Eze-Rinka Company (Nanjing, China). The zebrafishes were cultured in 5mL of embryo medium supplemented with 1-phenyl-2-thiourea (PTU) in 6-well plates for 24h at  $30^\circ\text{C}$ . Zebrafishes were divided into two groups and both incubated with **TBBA** ( $10 \text{ } \mu\text{M}$ ) for 1h. After washing three times to remove the remaining **TBBA**, one group as control group and other group further treated with  $\text{Hg}^{2+}$  ( $100 \text{ } \mu\text{M}$ ) for another 1 h. The fluorescence images were acquired with stereo microscopy (Olympus SZX16, Japan).

#### **LIVE SUBJECT STATEMENT:**

All experiments were performed in accordance with the Guidelines "Declaration of Helsinki Principles", and approved by the ethics committee at "Gannan Medical University".

20191217-Hg-0

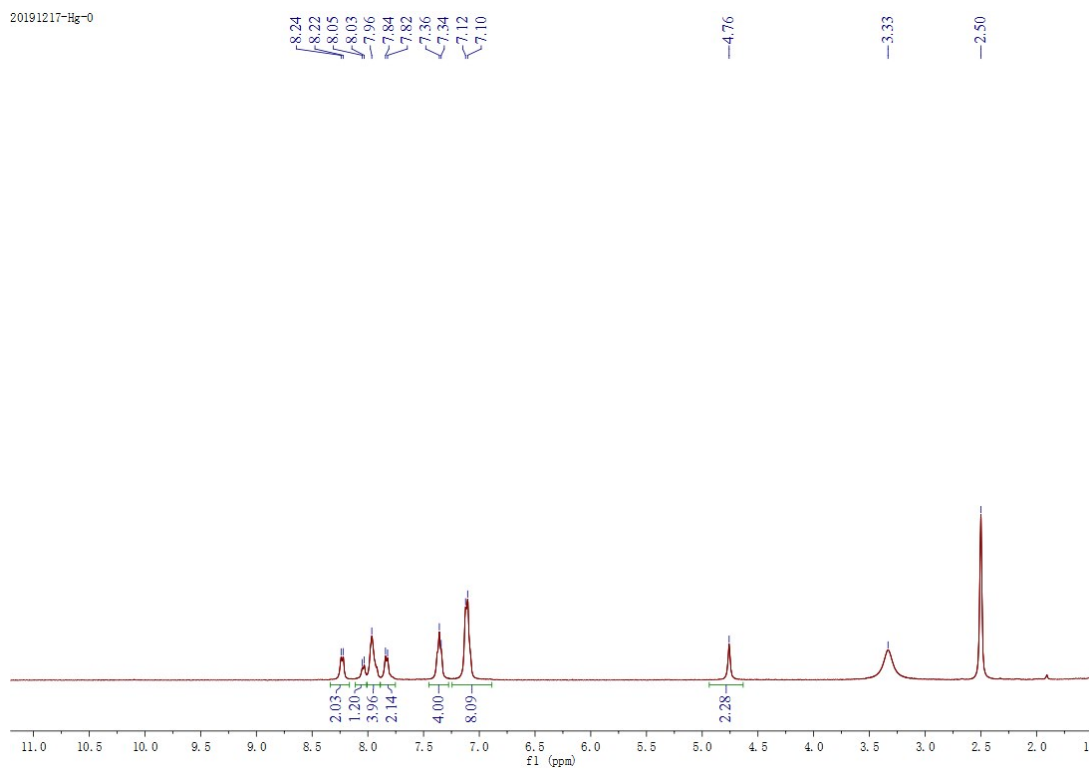

Figure S1.  $^1\text{H}$  NMR Spectrum of probe TBBA in  $\text{DMSO-}d_6$

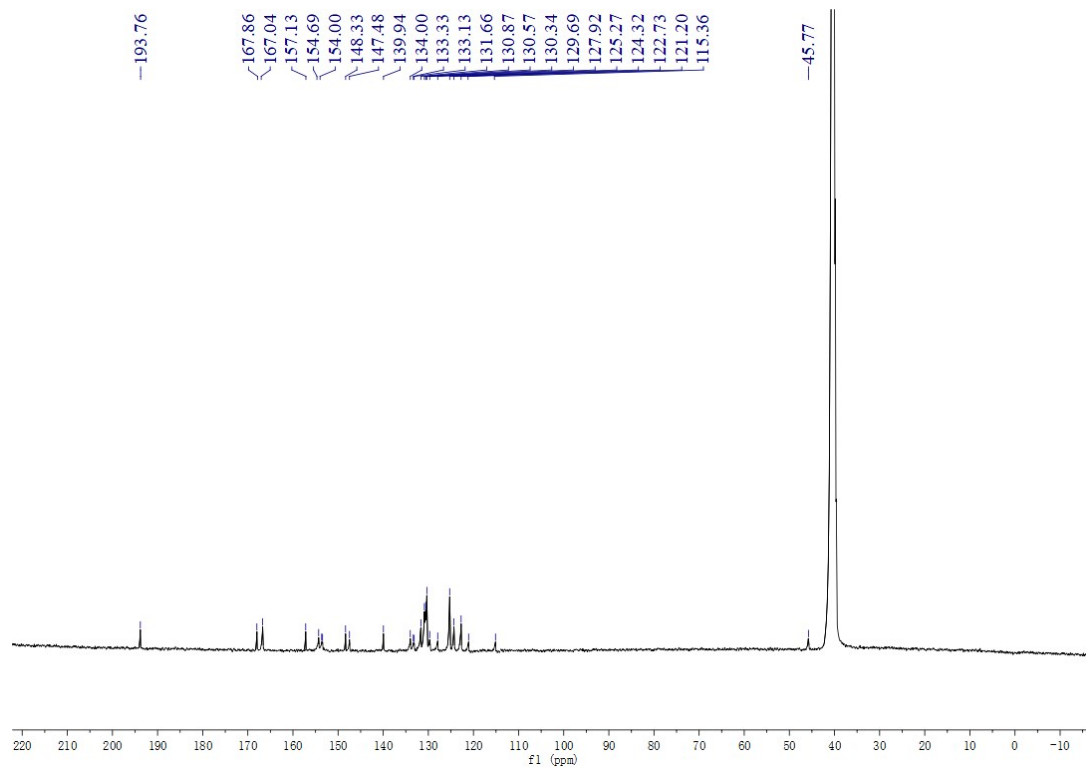

Figure S2.  $^{13}\text{C}$  NMR Spectrum of probe TBBA in  $\text{DMSO-}d_6$

2005153691-A #43 RT: 0.20 AV: 1 NL: 2.11E8  
T: FTMS + p ESI Full ms [120.0000-1500.0000]

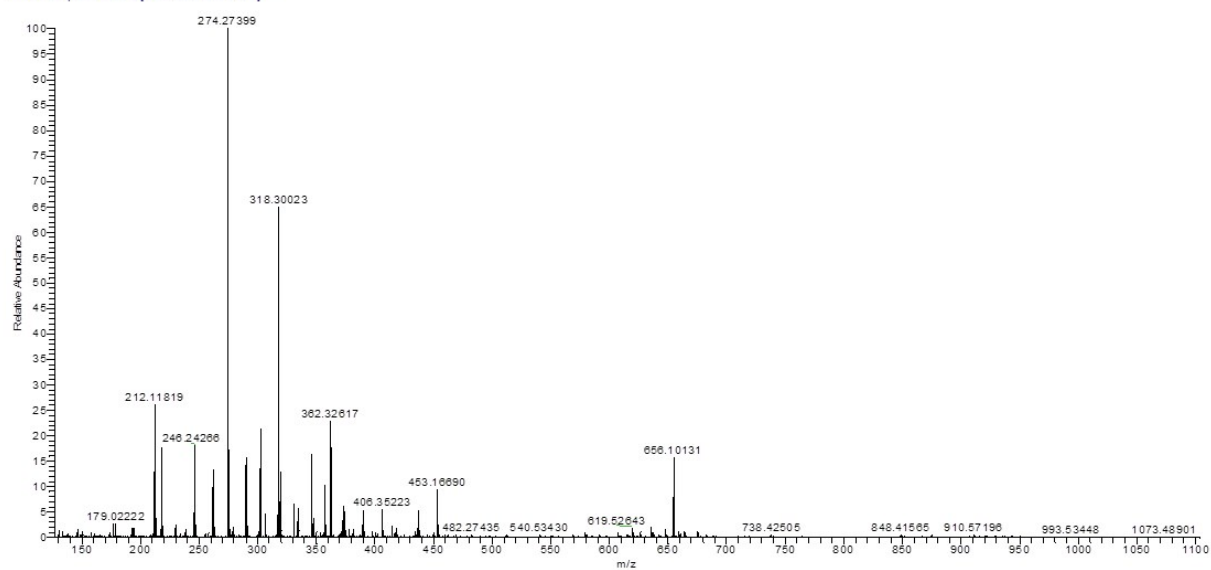

Figure S3 HRMS spectrum of TBBA

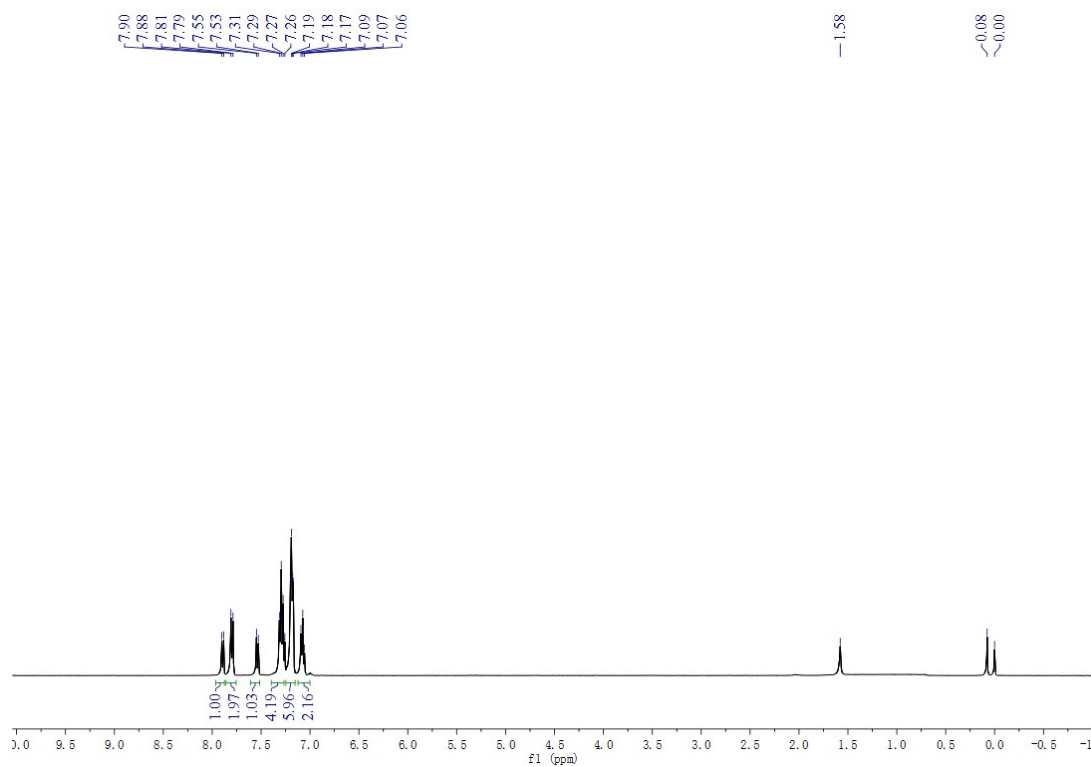

Figure S4. <sup>1</sup>H NMR Spectrum of intermediate M1 in CDCl<sub>3</sub>

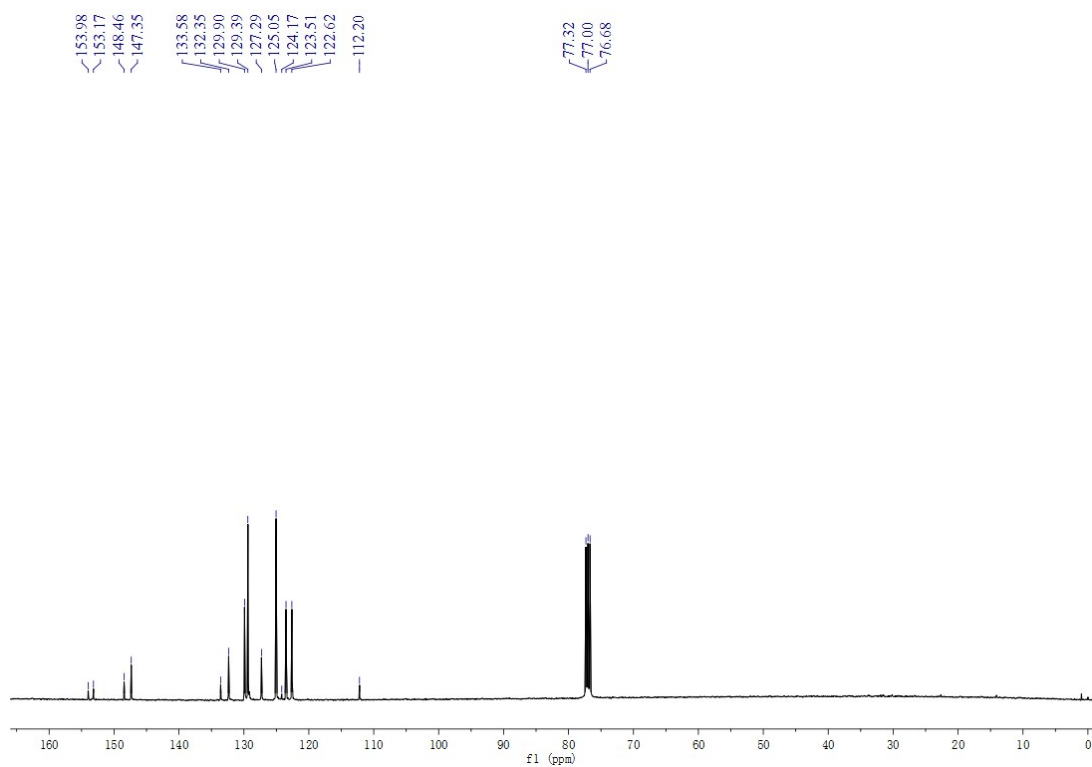

**Figure S5.**  $^{13}\text{C}$  NMR Spectrum of intermediate **M1** in  $\text{CDCl}_3$

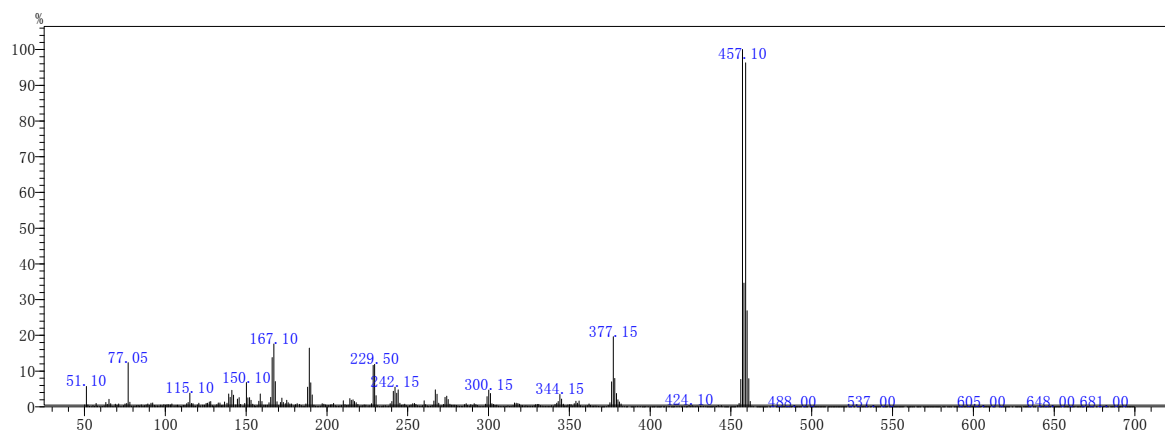

**Figure S6** EI-MS spectrum of intermediate **M1**



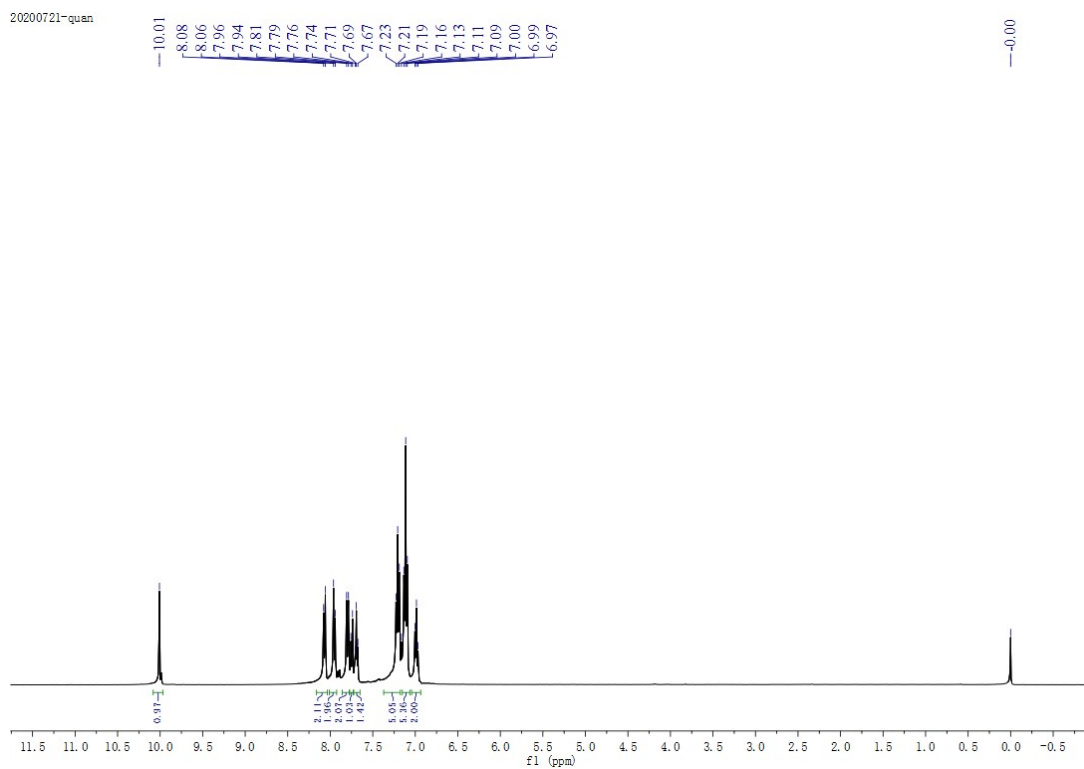

**Figure S7.**  $^1\text{H}$  NMR Spectrum of intermediate **M2** in  $\text{CDCl}_3$

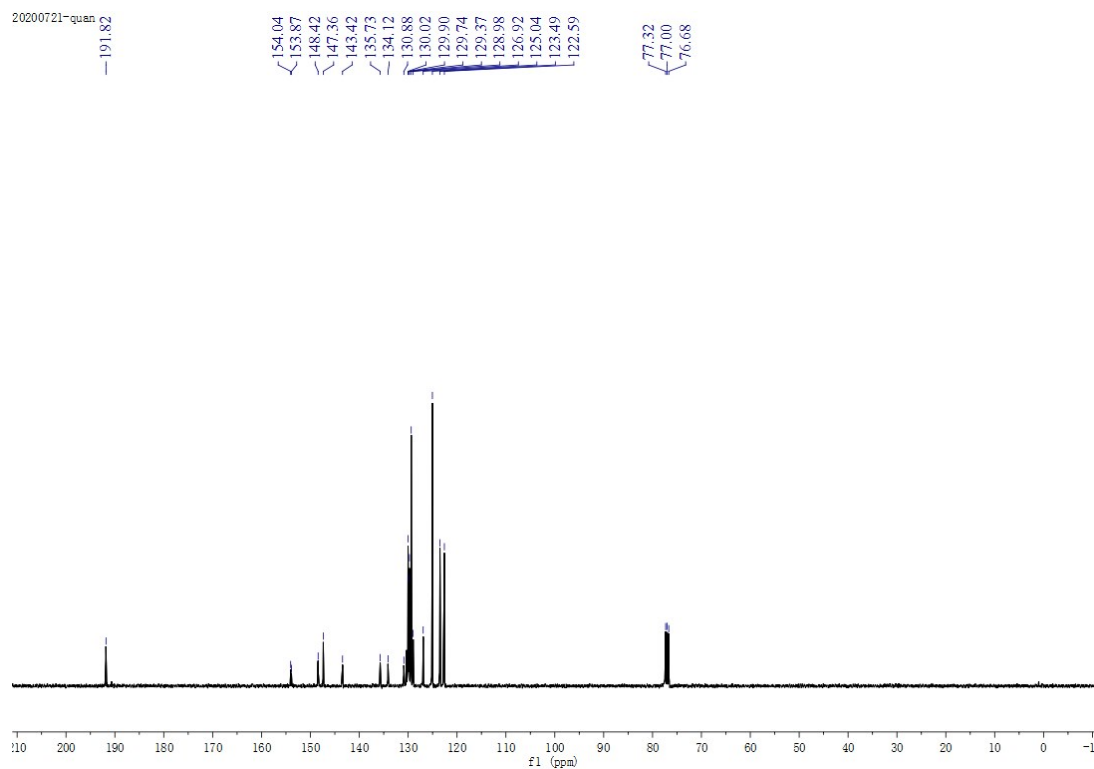

**Figure S8.**  $^{13}\text{C}$  NMR Spectrum of intermediate **M2** in  $\text{CDCl}_3$

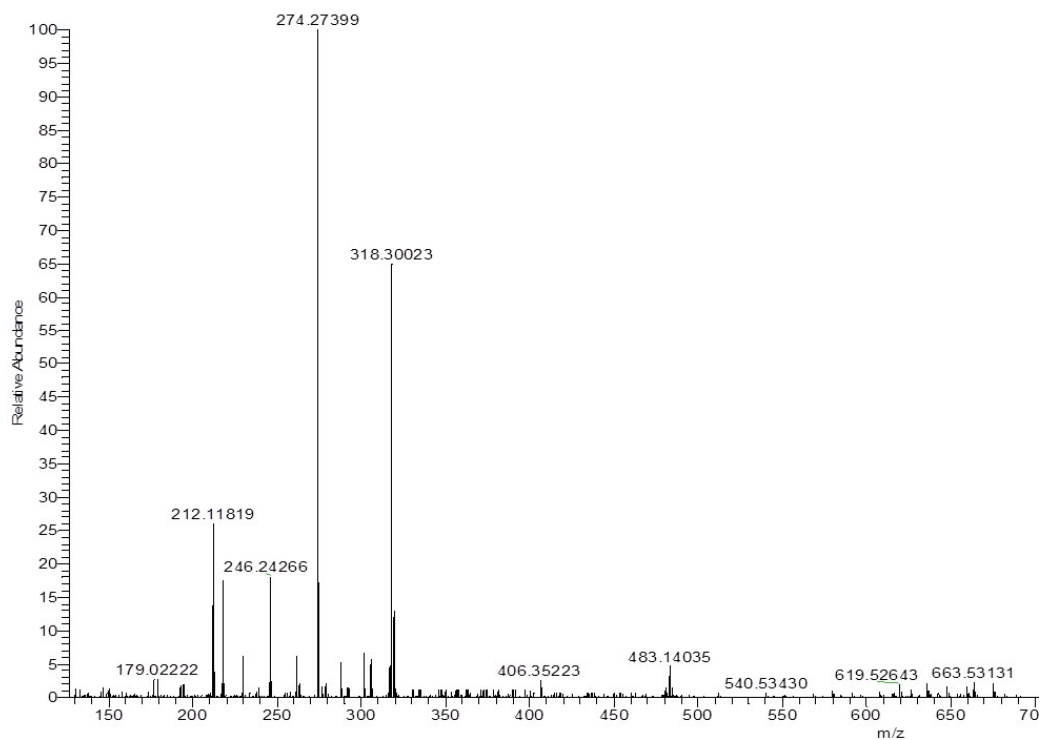

**Figure S9** HRMS spectrum of intermediate **M1**.

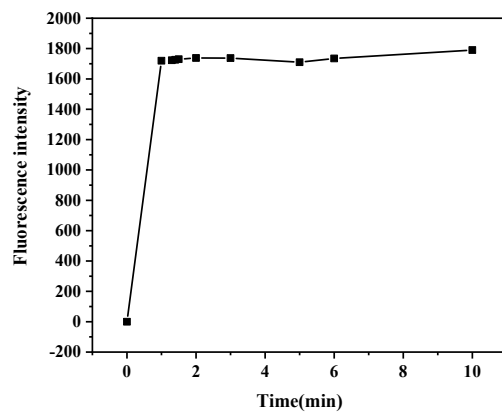

**Figure S10.** Effect of response time on the fluorescence intensity of TBBA (20 μM) in the presence of 80 μM Hg<sup>2+</sup>

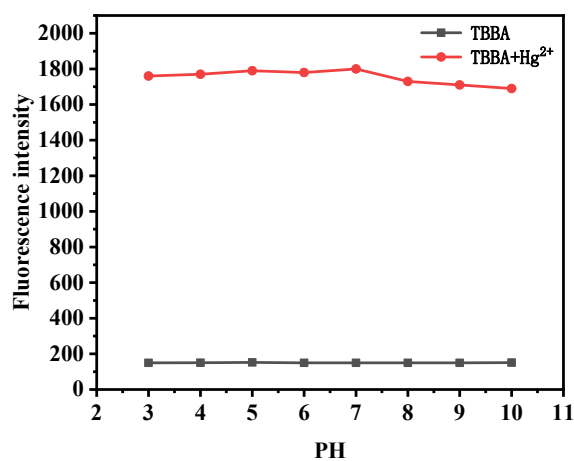

Figure S11. Fluorescence of probe TBBA (20 μM) and TBBA-Hg<sup>2+</sup> at different pH.

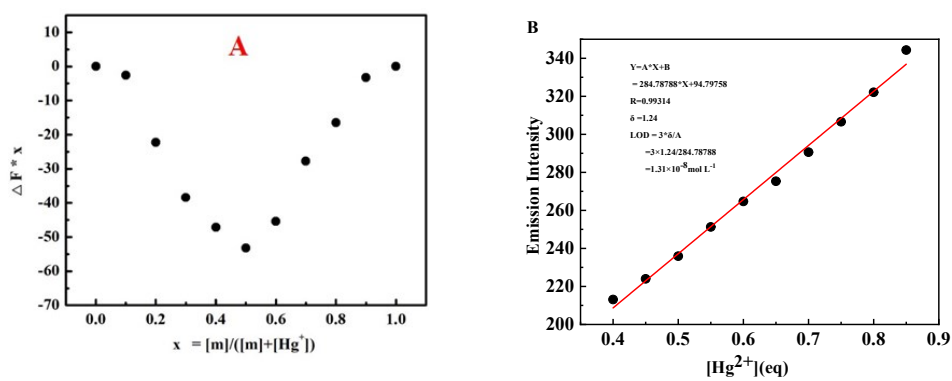

Figure S12 (A) Job's plot for the complex of TBBA with Hg<sup>2+</sup>; (B) The limit of detection (LOD) is 13.1 nM.

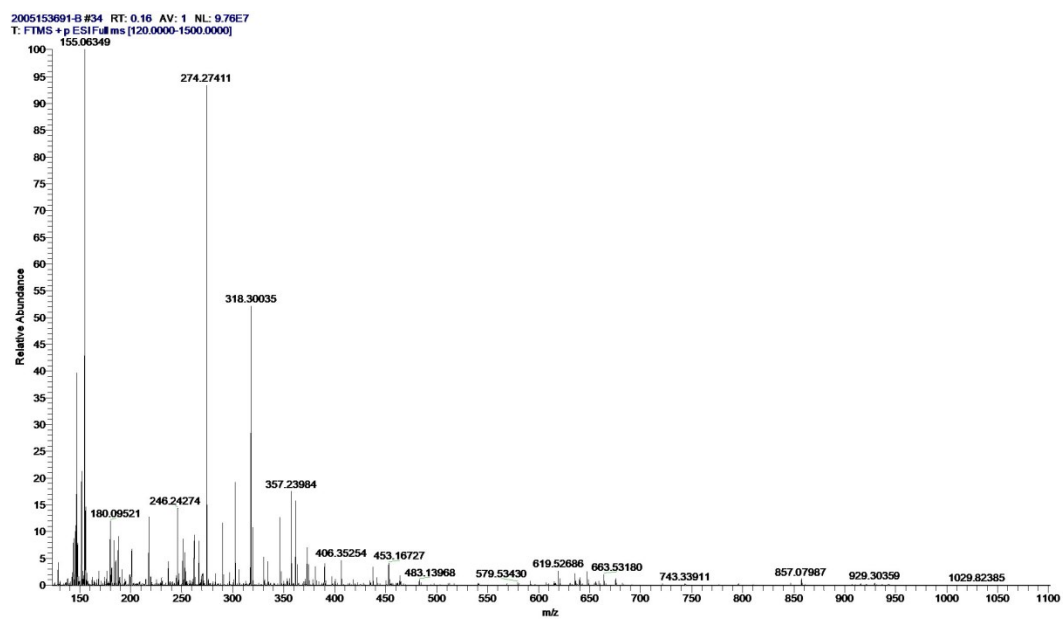

**Figure S13** ESI-MS spectrum of TBBA in the presence of 3 equiv.  $\text{Hg}^{2+}$ .

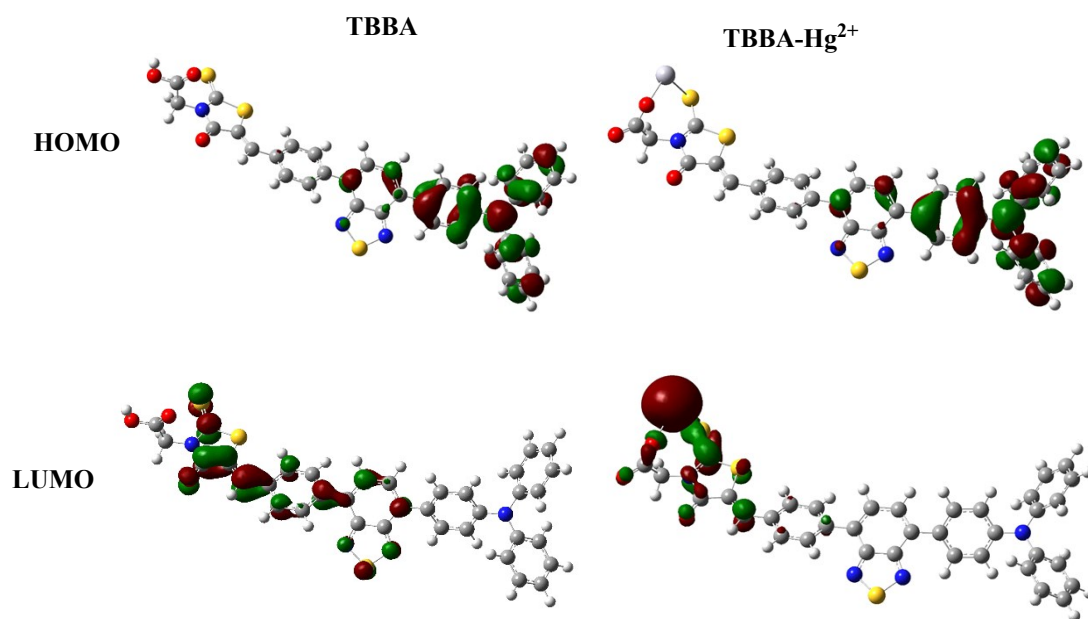

**Figure S14** HOMO-LUMO energy diagrams of TBBA with  $\text{Hg}^{2+}$  ions.

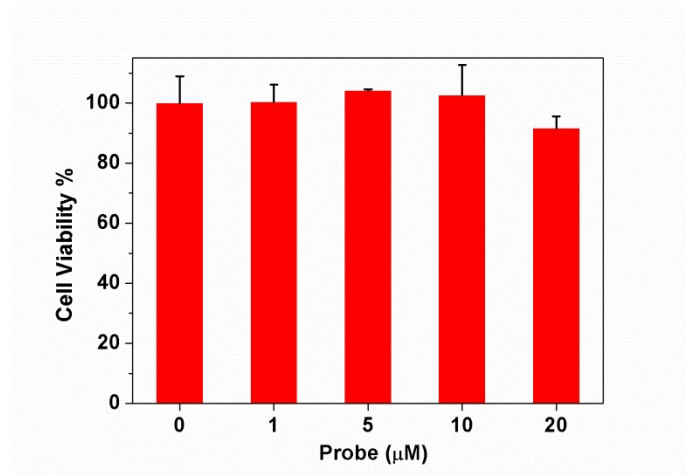

**Figure S15.** The cytotoxicity of TBBA against normal cells incubated with different concentration of TBBA for 24 h

**Table 1** Comparison on detection limits of reported fluorescent sensor for Hg<sup>2+</sup> ion.

| Probes                                                                              | $\lambda_{em}$ (nm) | $\lambda_{ex}$ (nm) | Stocks shift(nm) | LOD     | Cell imaging | Zebrafish experiment | References in main manuscript |
|-------------------------------------------------------------------------------------|---------------------|---------------------|------------------|---------|--------------|----------------------|-------------------------------|
| 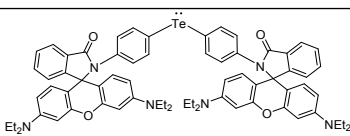  | 582                 | 515                 | 67               | 1.71 μM | No           | No                   | 4                             |
|  | 604                 | 560                 | 44               | 17 nM   | No           | No                   | 5                             |
|  | 592                 | 355                 | 237              | 43 pM   | No           | No                   | 6                             |
|  | 625                 | 475                 | 150              | 7.1 nM  | Yes          | Yes                  | 7                             |
|  | 659                 | 514                 | 145              | 68 nM   | Yes          | No                   |                               |

|                                                                                     |     |     |     |                         |     |     |    |
|-------------------------------------------------------------------------------------|-----|-----|-----|-------------------------|-----|-----|----|
|                                                                                     |     |     |     |                         |     |     | 8  |
| 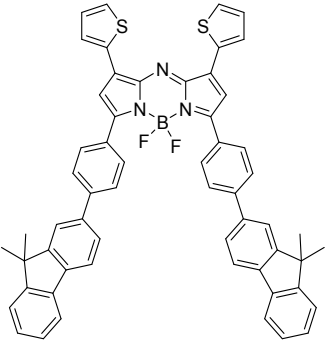   | 750 | 650 | 100 | 2.51 $\mu$ M            | No  | No  | 9  |
|   | 746 | 670 | 76  | 1.91 $\times 10^{-7}$ M | No  | No  | 10 |
|  | 661 | 500 | 161 | 9.95nM                  | Yes | No  | 11 |
|  | 645 | 517 | 128 | 0.14 $\mu$ M            | Yes | Yes | 12 |

|                                                                                     |             |     |     |         |     |     |              |
|-------------------------------------------------------------------------------------|-------------|-----|-----|---------|-----|-----|--------------|
| 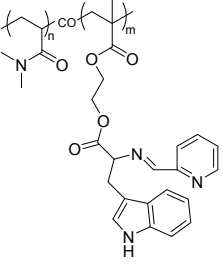   | 364,<br>464 | 285 | 79  | 4.71nM  | No  | No  | 13           |
|    | 529         | 319 | 210 | 2.4μM   | Yes | Yes | 14           |
|    | 615         | 470 | 145 | 0.22 μM | Yes | Yes | 14           |
|   | 618         | 470 | 148 | 2.86 μM | Yes | No  | 14           |
|  | 657         | 480 | 177 | 13.1nM  | Yes | Yes | This<br>work |

## References

- (a)S.-J. Li, Y.-J. Fu, C.-Y. Li, Y.-F. Li, L.-H. Yi and J. Ou-Yang, *Anal. Chim. Acta*, 2017, **994**, 73-81; (b)E. Bozkurt, M. Arik and Y. Onganer, *Sensor Actuat B-Chem.*, 2015, **221**, 136-147.
- (a)Y. Li, J. Wu, X. Jin, J. Wang, S. Han, W. Wu, J. Xu, W. Liu, X. Yao and Y. Tang, *Dalton Trans.*, 2014, **43**, 1881-1887; (b)M. Ahumada, E. Lissi, A. M. Montagut, F. Valenzuela-Henríquez, N. L. Pacioni and E. I. Alarcon, *Analyst*, 2017, **142**, 2067-2089.
- M. Shortreed, R. Kopelman, M. Kuhn and B. Hoyland, *Anal. Chem.*, 1996, **68**, 1414-1418.
- A. A. Soares-Paulino, L. Giroldo, G. Celante, C. Lodeiro and A. A. Dos Santos, *Dyes Pigm.*, 2018, **159**, 121-127.
- J. Xu, Z. Wang, C. Liu, Z. Xu, N. Wang, X. Cong and B. Zhu, *Luminescence*, 2018, **33**, 1122-1127.
- Y. Jiang, Q. Duan, G. Zheng, L. Yang, J. Zhang, Y. Wang, H. Zhang, J. He, H. Sun and D. Ho, *Analyst*, 2019, **144**, 1353-1360.
- L. Yang, Y. Su, Y. Geng, H. Xiong, J. Han, Q. Fang and X. Song, *Org. Biomol. Chem.*, 2018, **16**, 5036-5042.
- L. Huang, Z. Yang, Z. Zhou, Y. Li, S. Tang, W. Xiao, M. Hu, C. Peng, Y. Chen, B. Gu and H. Li, *Dyes Pigm.*, 2019, **163**, 118-125.
- S. Liu, Z. Shi, W. Xu, H. Yang, N. Xi, X. Liu, Q. Zhao and W. Huang, *Dyes Pigm.*, 2014, **103**, 145-153.
- S.-K. Yao, Y. Qian, Z.-Q. Qi, C.-G. Lu and Y.-P. Cui, *New J. Chem.*, 2017, **41**, 13495-13503.

11. X. Jiao, C. Liu, S. He, L. Zhao and X. Zeng, *Dyes Pigm.*, 2019, **160**, 86-92.
12. H. Lv, G. Yuan, G. Zhang, Z. Ren, H. He, Q. Sun, X. Zhang and S. Wang, *Dyes Pigm.*, 2020, **172**, 107658.
13. N. Choudhury, B. Ruidas, B. Saha, K. Srikanth, C. Das Mukhopadhyay and P. De, *Polym Chem.*, 2020, **11**, 2015-2026.
14. L. Xiao, Q. Sun, Q. Zhao and X. Cheng, *Anal. Bioanal. Chem.*, 2020, **412**, 881-894.
